# Supplementary material
Source: PubMed Central journal article supplement (PMC549025)

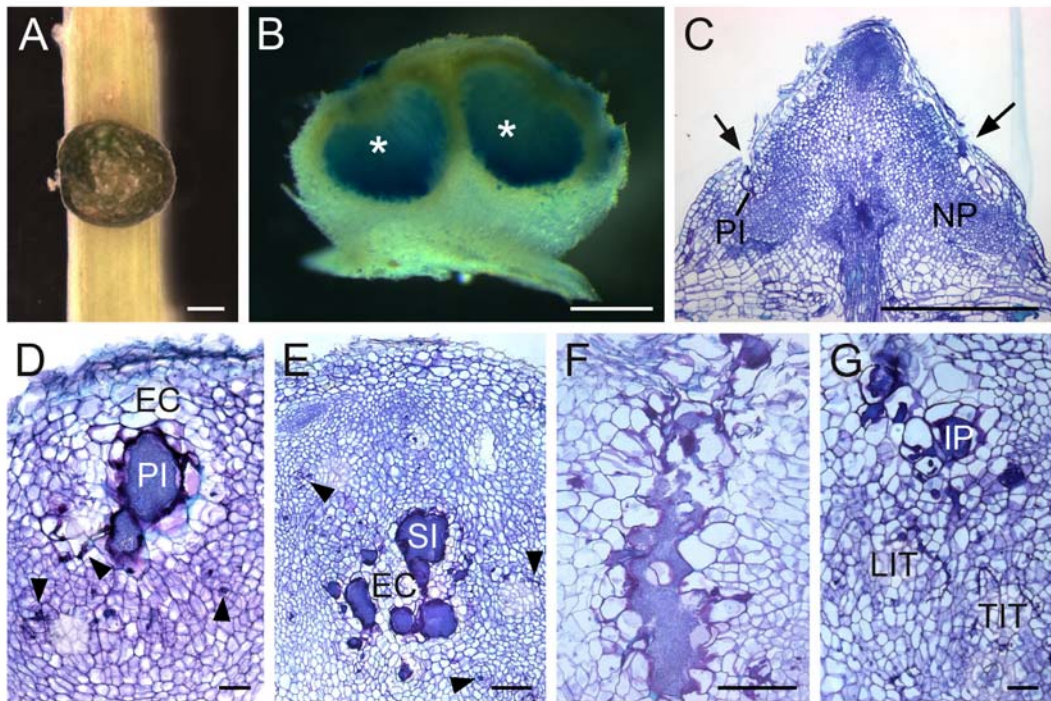

Supplement: pnas_102_7_2655__2.pdf [file pnas_102_7_2655__2.pdf]

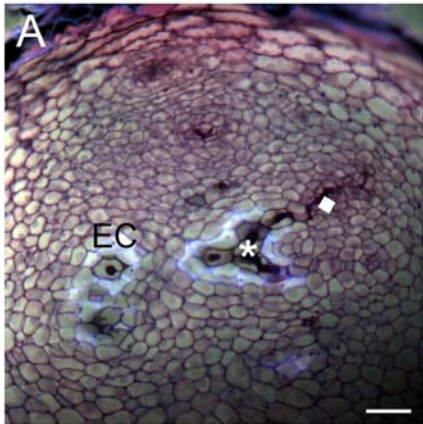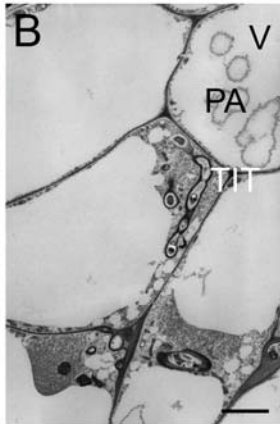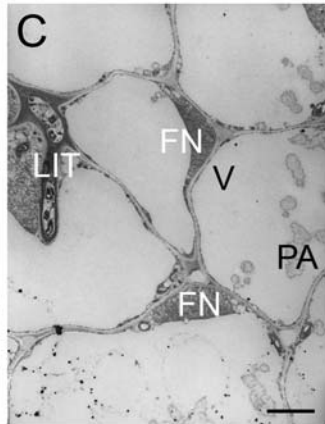

Supplement: pnas_102_7_2655__4.pdf [file pnas_102_7_2655__4.pdf]
